# Supplementary material
Source: Springer Nature journal article supplement (https://www.springerprofessional.de/resource/supplementary/13638_2011_154_MOESM4_ESM.pdf/11897168)

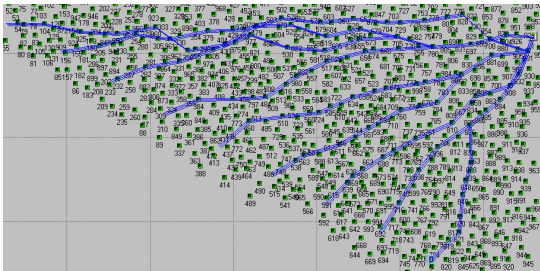

(a) GPSR

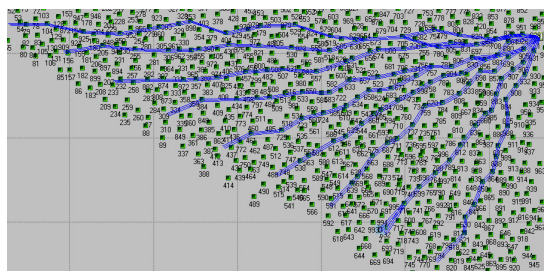

(b) MGR

Supplement: MOESM4 [file 11897168]
